# Development and validation of a triplex qPCR assay to detect efflux pump-mediated antibiotic resistance in *Burkholderia pseudomallei*

Jessica R. Webb,<sup>a</sup> Erin P. Price,<sup>a,b</sup> Nawarat Somprasong,<sup>c</sup> Herbert P. Schweizer,<sup>c</sup> Robert W. Baird,<sup>d</sup> Bart J. Currie,<sup>a,d</sup> Derek S. Sarovich,<sup>a,b,\*</sup>

Global and Tropical Health Division, Menzies School of Health Research, Darwin, Northern Territory, Australia<sup>a</sup>; Faculty of Science, Health, Education and Engineering, University of the Sunshine Coast, Sippy Downs, Queensland, Australia<sup>b</sup> College of Medicine, Department of Molecular Genetics and Microbiology, Emerging Pathogens Institute, University of Florida, Gainesville, Florida, USA<sup>c</sup> Departments of Infectious Diseases and Pathology and Northern Territory Medical Program, Royal Darwin Hospital, Darwin, Northern Territory, Australia<sup>d</sup>

**ABSTRACT** *Burkholderia pseudomallei*, the causative agent of the deadly tropical disease melioidosis, is intrinsically resistant to many antibiotics, leaving few effective treatment options. Trimethoprim-sulfamethoxazole (SXT), meropenem (MEM) and doxycycline (DOX) are valuable antibiotics for melioidosis treatment due to inherently low or no primary resistance. Although considered rare, upregulation of one or more resistance-nodulation-division (RND) efflux pumps is now known to lead to acquired resistance towards these drugs in *B. pseudomallei*. Here, we developed a triplex quantitative PCR assay to detect upregulation of the three clinically relevant RND efflux systems: AmrAB-OprA, BpeB-OprB and BpeEF-OprC. The triplex assay was tested on seven clinically-derived *B. pseudomallei* isogenic pairs, where the latter strain of each pair had altered regulator activity and exhibited reduced susceptibility to SXT, MEM or DOX. The triplex assay accurately detected efflux pump upregulation between isogenic pairs, which corresponded with decreased antibiotic susceptibility. We further verified assay performance on eight laboratory-generated *B. pseudomallei* mutants encoding efflux pump regulator mutations. Targeting antibiotic resistance in *B. pseudomallei* using molecular genotyping provides clinicians with a rapid tool to identify potential treatment failure in near real-time, enabling informed alteration of treatment during an infection and improved patient outcomes.

**IMPORTANCE** The melioidosis bacterium *Burkholderia pseudomallei* is intrinsically resistant to many antibiotics, limiting treatment options to a handful of drugs including meropenem, doxycycline and trimethoprim-sulfamethoxazole. Although rare, there have now been several documented melioidosis cases where resistance to these antibiotics has developed during an infection, leading to treatment failure and increased mortality rates. Interestingly, all strains resistant to these drugs exhibit increased efflux pump expression, representing a shared molecular signature that can be exploited for rapid diagnostic purposes. Here, we developed and validated a single-tube real-time qPCR assay to detect clinically relevant efflux pump upregulation in *B. pseudomallei*, an important first step towards high-level resistance. This triplex assay offers a drastically reduced turn-around-time compared to current methodology, enabling earlier detection of resistance emergence. Implementation of this new diagnostic will aid clinicians in the selection of appropriate therapy, thereby minimizing resistance development and treatment failure for this high-mortality disease.

Compiled April 17, 2018

This is a draft manuscript, pre-submission

Address correspondence to Derek S. Sarovich, dsarovich@usc.edu.au.

E.P.P. and D.S.S. contributed equally to this work.

Webb et al.

**KEYWORDS:** *Burkholderia pseudomallei*, antibiotic resistance, melioidosis, efflux pump, gene expression, qPCR

## INTRODUCTION

The development of antibiotic resistance in Gram-negative bacteria has become a global crisis as declared by the World Health Organization (1) and Centers for Disease Control and Prevention (2). The Gram-negative bacterium *B. pseudomallei*, the causative agent of melioidosis, is one of the most intrinsically antibiotic resistant bacteria (3, 4, 5), due to its diverse array of chromosomally-encoded resistance mechanisms (6). This inherent resistance limits melioidosis treatment options to a small number of antibiotics. Resistance emergence to any of these drugs during treatment is thus of great concern given the limited number of alternative treatments.

Melioidosis is arguably one of the most neglected tropical diseases of our time, with gross underreporting of cases, particularly in emerging endemic regions (7). Recent modelling suggests that there are 165,000 melioidosis cases worldwide annually, of which 89,000 are fatal, rates that are similar to the much higher profile disease, measles (8). There is currently no vaccine towards *B. pseudomallei*, with treatment fully reliant on antibiotic administration, which is biphasic and lengthy. Treatment typically involves 10-14 days of intravenous ceftazidime (CAZ), with meropenem (MEM) used in severe cases or when resistance develops towards CAZ (9). The eradication phase consists of at least three months of trimethoprim-sulfamethoxazole (SXT) or amoxicillin-clavulanate, with doxycycline (DOX) used in instances where patients develop impaired renal function, bone marrow suppression or skin reactions due to SXT intolerance (10). The emergence of resistance during treatment is fortunately rare, but has now been documented for almost all antibiotics used to treat melioidosis (11, 12, 13, 14, 15), the exception being high-level (>12 µg/mL) MEM resistance. Alarming, cases of *B. pseudomallei* exhibiting decreased susceptibility to MEM have recently been identified in Australian patients (16), and are associated with prolonged blood culture positivity and poorer patient outcomes (17).

*B. pseudomallei* encodes for three clinically relevant resistance-nodulation-cell division (RND) efflux pumps: AmrAB-OprA (*BSPL1802-BPSL1804*), BpeAB-OprB (*BPSL0814-BPSL0816*) and BpeEF-OprC (*BPSS0292-BPSS0294*), which give rise to resistance towards multiple antibiotic classes (18, 19, 20). Each RND system consists of a membrane fusion protein (AmrA, BpeA, and BpeE, respectively), an RND transporter (AmrB, BpeB, and BpeF, respectively), an outer membrane protein (OprA, OprB, and OprC, respectively), and one or more regulators (AmrR [BPSL1805], BpeR [BPSL0812], and BpeT [BPSS0290] and BpeS [BPSL0731], respectively) (21). Overexpression of these efflux pumps can occur during the course of melioidosis treatment due to loss-of-function mutations in repressors or mutations leading to co-inducer independence of activators in their associated regulatory genes (17, 22, 23, 24). For instance, certain mutations affecting the TetR-type regulator gene, *amrR*, cause decreased MEM susceptibilities in melioidosis patients with prolonged infections (17), and in combination with mutations in the SAM-dependent methyltransferase gene *BPSL3085*, can lead to clinically significant DOX resistance (23). The *bpeT* and *bpeS* genes encode two closely related LysR-type transcriptional regulators. Mutations that affect the carboxy-terminal co-inducer-binding domains of BpeT and BpeS, usually together with mutations in a tetrahydrofolate pathway-linked pterin reductase gene, *ptr1/fofM*, have been associated with SXT resistance (22, 24). The *bpeR* regulator is less well-characterized, although a mutation within this gene has been found in a clinical *B. pseudomallei* isolate that has intermediate

## Detection of efflux pump upregulation in *B. pseudomallei*

92 resistance to multiple drugs, including MEM (17). Importantly, all observed cases of  
93 MEM, DOX and SXT resistance have involved upregulation of one or more of these  
94 three RND efflux pumps (17, 25).

95 Despite the critical role that these RND efflux systems play in conferring acquired  
96 antibiotic resistance in *B. pseudomallei*, no methods are currently available to quickly  
97 and simultaneously detect their altered expression. A number of singleplex PCR assays  
98 have been published (24, 26, 27, 28); however, these assays are SYBR Green-based and  
99 thus cannot be multiplexed, making them more time-consuming and costly to perform.  
100 Additionally, SYBR Green-based assays are typically less robust and less specific than  
101 probe-based PCR assays due to the non-specific nature of the fluorogenic SYBR Green  
102 dye, which detects all double-stranded DNA molecules. Therefore, the aim of this study  
103 was to develop a robust and highly specific fluorogenic probe-based triplex quantitative  
104 real-time PCR (qPCR) assay to simultaneously detect the upregulation of the RND efflux  
105 pumps AmrAB-OprA, BpeAB-OprB and BpeEF-OprC in strains exhibiting increased  
106 minimum inhibitory concentrations (MICs) towards DOX, MEM and SXT. The triplex  
107 assay was first validated to determine the limits of quantitation (LoQ), detection (LoD),  
108 and linearity, and then tested against a panel of genetically characterized, antibiotic  
109 resistant *B. pseudomallei* isolates.

## 110 RESULTS

111 **Limits of quantitation (LoQ) and detection (LoD), and linearity of the triplex**  
112 **qPCR assay.** Following the design of probe-based assays targeting *amrB*, *bpeB* and  
113 *bpeF*, the lower LoQ and LoD was first calculated for each assay in the singleplex format,  
114 and subsequently in the triplex format. LoD was defined as the lowest analyte concen-  
115 tration at which detection is feasible, and LoQ was defined as the lowest concentration  
116 of analyte that can be determined with an acceptable level of precision and accuracy  
117 (29). Based on these definitions, the LoQ was determined as the lowest amount of DNA  
118 where 8/8 replicates amplified with a CT standard deviation ( $\sigma$ ) of  $<0.8$ , and with good  
119 efficiency ( $R^2$  values  $>0.98$ ), and LoD was defined as the concentration where at least  
120 2/8 replicates amplified, irrespective of  $\sigma$  or efficiency. The lower LoQ in the singleplex  
121 format for all three assays was  $\geq 4 \times 10^{-4}$  ng ( $\geq 400$  fg, 52 genomic equivalents (GEs)),  
122 and the LoD was  $\geq 4 \times 10^{-6}$  ng ( $\geq 4$  fg, 0.5 GEs),  $\geq 4 \times 10^{-5}$  ng ( $\geq 40$  fg, 5 GEs) and  $\geq 4 \times 10^{-5}$   
123 ng ( $\geq 40$  fg, 5 GEs) for *amrB*, *bpeF* and *bpeB*, respectively. In the triplex format, for all  
124 targets, the LoQ was  $\geq 4 \times 10^{-3}$  ng ( $\geq 4$  pg, 515 GEs), and the LoD was  $\geq 4 \times 10^{-5}$  ng ( $\geq 40$   
125 fg, 5 GEs) (Figure 1).

126 Next, the linearity of these assays was determined in the triplex and singleplex  
127 format. Efficiency (linearity) was measured by the rate at which a PCR amplicon  
128 is generated (30), where the maximum quantitative accuracy occurs in assays that  
129 function at or near 100% efficiency. In the triplex format, the standard curves for *amrB*,  
130 *bpeF* and *bpeB* all had an  $R^2$  value of  $>0.95$  and showed good amplification efficiencies  
131 (90% for all three targets) (Figure S1). In singleplex format, the  $R^2$  values were  $>0.98$ ,  
132 with an efficiency of  $>98\%$  for all three assays (Figure S2).

133 **The conserved genes *mmsA* and 23S rDNA are suitable housekeeping genes**  
134 **for normalized expression analysis in *B. pseudomallei*.** To determine the perfor-  
135 mance of the conserved gene *mmsA* as an expression normalization control for all  
136 clinical isogenic and Bp82 pairs, we compared normalized efflux pump expression  
137 against both 23S and *mmsA* in the eight Bp82 mutants. The normalized fold change  
138 of the triplex efflux assay for the eight Bp82 pairs was consistent when either 23S or  
139 *mmsA* was used for normalization (Table S1), suggesting that *mmsA* expression, at least  
140 across the conditions that were tested in this study, is uniform. These results support

Webb et al.

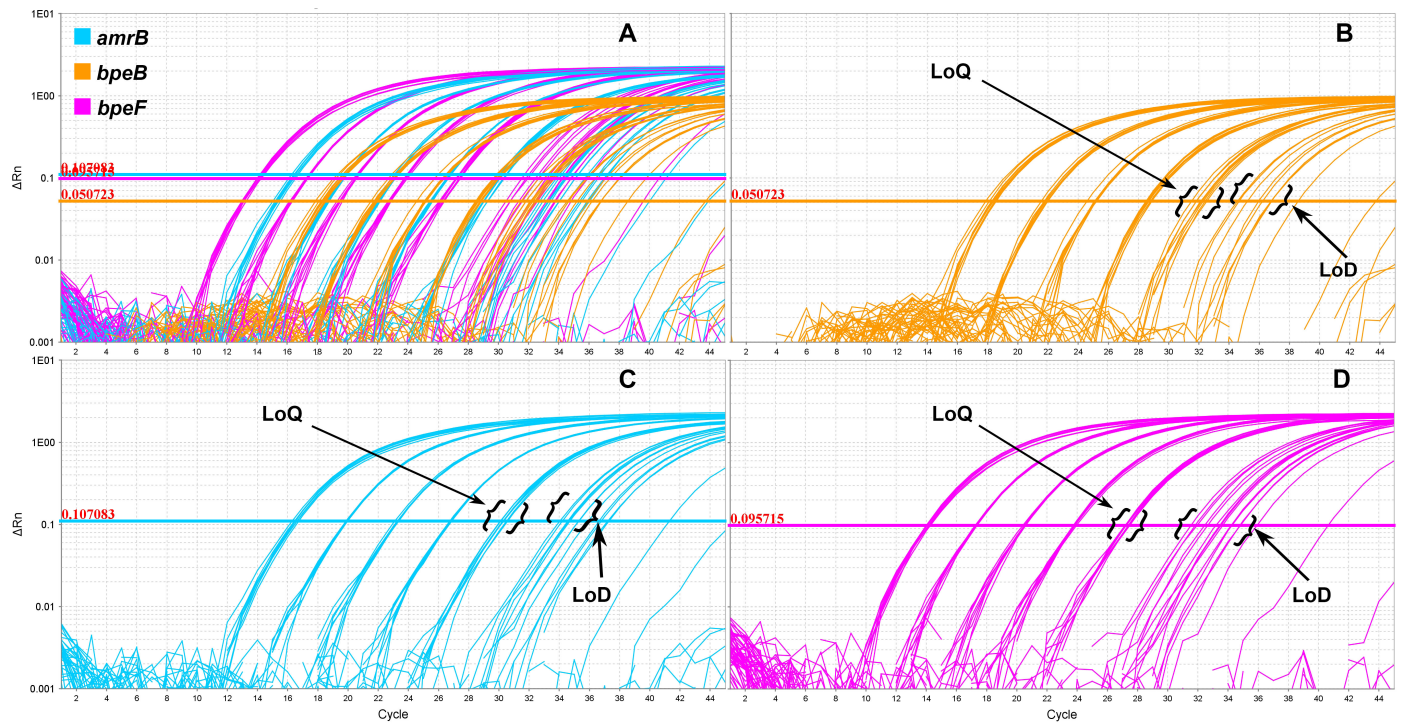

**FIG 1** Quantitative PCR amplification plots of the *Burkholderia pseudomallei* resistance-nodulation-division efflux pump triplex assay. A) Amplification across eight replicates at DNA concentrations ranging from 40 to  $4 \times 10^{-6}$  ng. B) Amplification plot of *bpeB*. C) Amplification plot of *amrB*. D) Amplification plot of *bpeF*. LoQ, limit of quantitation; LoD, limit of detection.

the use of *mmsA* as a single-copy normalization control gene in *B. pseudomallei*.

**Comparative genomic analysis identifies a novel *amrR* mutation in the latter P1048 isolate.** SPANDx analysis of MSHR9766 and MSHR9872 was carried out to identify the genetic basis for decreased MEM susceptibility in the latter isolate. Two missense mutations were detected in MSHR9872: a mutation in *AmrR* (*AmrR*<sub>G50E</sub>), and a mutation in the isoleucine tRNA synthetase gene, *ileS* (*BPSL0906*; *IleS*<sub>H505G</sub>), the product of which catalyzes the aminoacylation of Ile-tRNA. In addition, we detected a frameshift mutation in MSHR9872 within *BPSS2161* (*BPSS2161*<sub>A28fs</sub>), which encodes for a propanoate metabolism protein belonging to the MmgE-PrpD family. No other mutations (i.e. gene acquisition or loss, gene copy number variation) were identified between this pair.

**Efflux pump upregulation in eight clinical strains with regulatory mutations.**

The triplex qPCR assay was tested on eight clinical *B. pseudomallei* isolates that encompassed *amrR*, *bpeR* or *bpeT* mutants, including MSHR0052 *AmrR*<sub>E190\*</sub>, which lacks an isogenic pair. None of the clinical strains tested in our study encoded *bpeS* mutations. The triplex assay showed increased efflux expression in at least one of the RND efflux pumps in those isolates containing *amrR*, *bpeR* or *bpeT* regulatory mutations (Figure 2), consistent with their role in locally coordinating efflux pump expression. The latter strain from P215, MSHR0937, which encodes a mutation within the *bpeAB-oprB* regulator, *bpeR* (*BpeR*<sub>D176A</sub>), had a corresponding increase in the expression of *bpeB* (15x; 3.8-fold; Figure 2A) compared with its WT isogenic pair, MSHR0664. Similarly, the latter strain isolated from Patient CF6, MSHR5654, which encodes a mutation within the *bpeEF-oprC* regulator, *bpeT* (*BpeT*<sub>T314fs</sub>), showed significant upregulation of *bpeF* (9.5x; 3.2-fold) when compared with its WT isogenic pair, MSHR5651 (Figure 2B).

Six latter strains, all of which exhibited decreased susceptibility towards MEM (3-8



Detection of efflux pump upregulation in *B. pseudomallei*

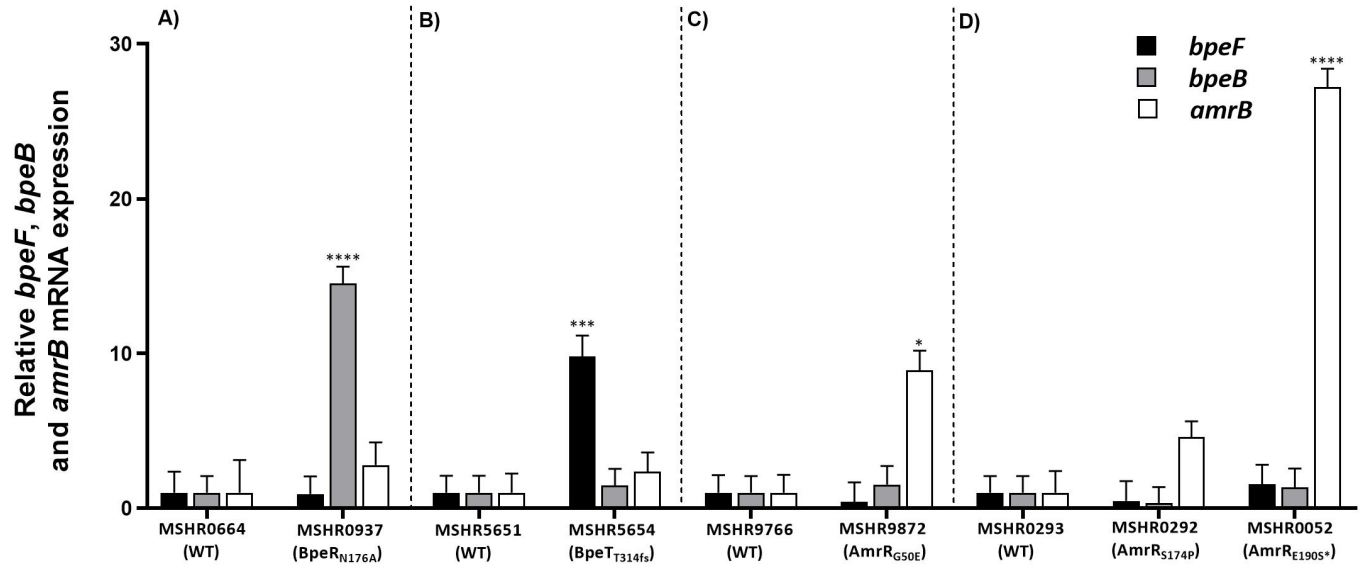

**FIG 2** AmrAB-OprA (*amrB*), BpeAB-OprB (*bpeB*) and BpeEF-OprC (*bpeF*) expression in five melioidosis cases harboring *B. pseudomallei* isolates that encode efflux pump regulator mutations. As an isogenic WT *B. pseudomallei* pair is lacking for MSHR0052, MSHR0293 was used as the WT control for normalized efflux expression of this strain. For all other strains, the WT isogenic pair was used for normalization. Efflux pump expression was normalized against the conserved gene, *mmsA* (31). Error bars denote standard deviation between biological replicates, which were all performed in technical duplicates. The y axis represents the relative times (x) change in *amrB*, *bpeB* and *bpeF* expression. Statistical analysis was done by two-way ANOVA and Tukey's multiple-comparison test. \*\*\*\*,  $p < 0.0001$ ; \*\*\*,  $p < 0.001$ ; \*\*,  $p < 0.01$ ; \*,  $p < 0.05$ .

166  $\mu\text{g}/\text{mL}$ ; Table 1), encoded mutations within the *amrAB-oprA* regulator, *amrR*. When  
 167 these six strains were tested with the triplex qPCR assay, only three (MSHR9872  
 168 AmrR<sub>G50E</sub>, MSHR0292 AmrR<sub>S174P</sub> and MSHR0052 AmrR<sub>E190S+</sub>) showed a significant  
 169 increase in *amrB* expression, which ranged from 5x (2.3-fold; MSHR0292 AmrR<sub>S174P</sub>) to  
 170 27x (4.7-fold; MSHR0052 AmrR<sub>E190S+</sub>) (Figures 2C and 2D). The remaining three *amrR*  
 171 mutant strains, MSHR7929 AmrR<sub>E30D</sub>, MSHR4083 AmrR<sub>ΔA153-D156</sub> and MSHR6755  
 172 AmrR<sub>ΔV60-C63</sub>, showed no significant increase in *amrB* expression. Importantly, the  
 173 amplification of the triplex assay for all the isogenic strains was within the LoQ of the  
 174 triplex assay, ruling this factor out as a cause for the lack of differential expression.

175 **Induction of AmrAB-OprA in *B. pseudomallei* *amrR* mutants exhibiting de-**  
 176 **creased MEM susceptibilities.** To better understand the lack of differential expres-  
 177 sion of *amrAB-oprA* in some strains with altered *amrR*, the triplex qPCR assay was  
 178 tested on RNA extracted from MSHR4083, MSHR6755 and MSHR6755  $\Delta amrR$  grown in  
 179 the presence of a sub-inhibitory (0.25  $\mu\text{g}/\text{mL}$ ) concentration of MEM. For MSHR6755  
 180 AmrR<sub>ΔV60-C63</sub>, *amrB* was dramatically upregulated (24x; 4.6-fold) in the presence of  
 181 MEM (Figure 3B). Additionally, the triplex assay revealed a subtle (2x; 0.9-fold) increase  
 182 in the expression of *bpeB* and *bpeF* in this strain when grown in the presence of MEM  
 183 (Figure 3B). In MSHR6755  $\Delta amrR$ , MEM induction also resulted in 12x (3.5-fold) *amrB*  
 184 upregulation (Figure 3B). Similarly, MEM induction led to 21x (4.2-fold) upregulation  
 185 of *amrB* in MSHR4083 AmrR<sub>ΔA153-D156</sub> (Figure 3C). Unlike MSHR6755 AmrR<sub>ΔV60-C63</sub>,  
 186 MEM did not induce *bpeB* and *bpeF* upregulation in MSHR6755  $\Delta amrR$  or MSHR4083  
 187 AmrR<sub>ΔA153-D156</sub>.

188 **Increased efflux expression in laboratory-generated efflux regulator mutants.**  
 189 The triplex qPCR assay was tested on eight laboratory-generated Bp82 mutants con-

Webb et al.

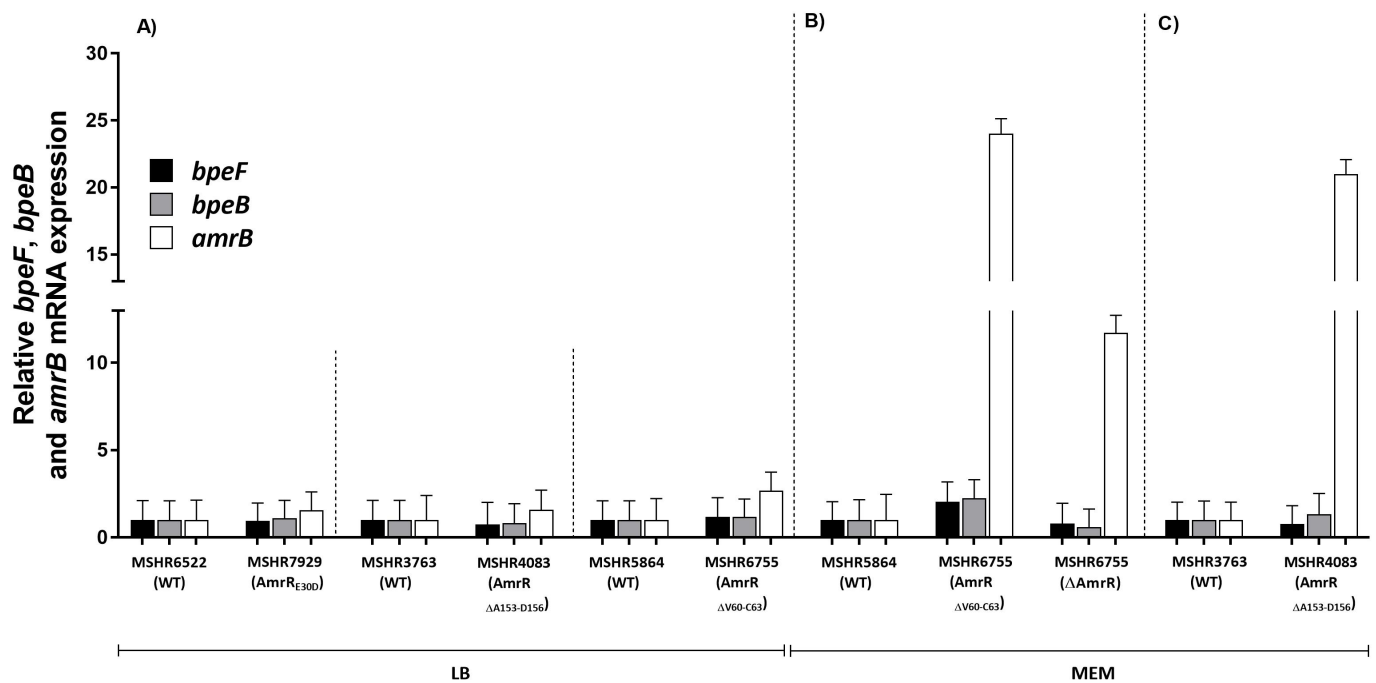

**FIG 3** AmrAB-OprA (*amrB*), BpeAB-OprB (*bpeB*) and BpeEF-OprC (*bpeF*) expression in *Burkholderia pseudomallei*, with the latter isolate of each pair containing *amrR* point mutations or deletions that confer decreased meropenem (MEM) susceptibility. A) Three isogenic pairs grown in Luria-Bertani (LB) broth; B) isogenic pair MSHR5864 and MSHR6755 (and *AmrR* knockout MSHR6755  $\Delta$ *amrR*) grown in LB plus MEM; C) isogenic pair MSHR3763 and MSHR4083 grown in LB broth plus MEM. Efflux pump expression was normalized against the conserved gene, *mmsA* (31). Error bars denote standard deviation between biological duplicates, which were all performed in technical duplicates. The y axis represents the relative times (x) change in *amrB*, *bpeB* and *bpeF* expression. Statistical analysis was done by two-way ANOVA and Tukey's multiple-comparison test, a statistically significant *p* value was not identified between pairs.

Detection of efflux pump upregulation in *B. pseudomallei*

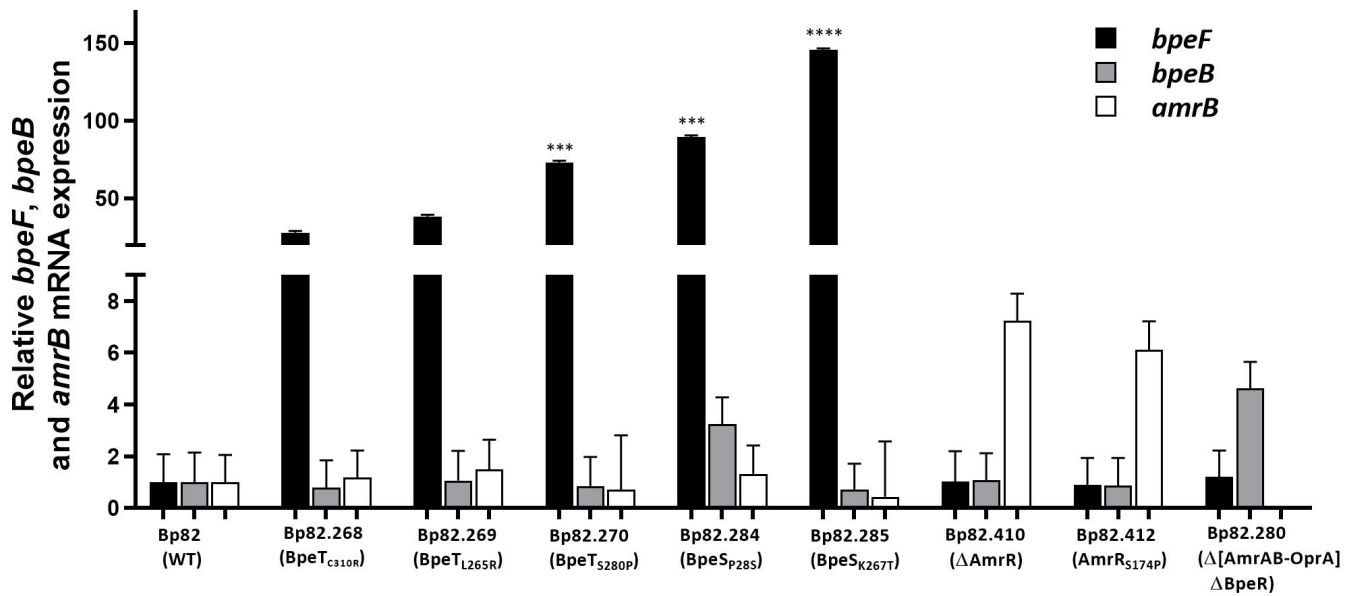

**FIG 4** *AmrAB-OprA* (*amrB*), *BpeAB-OprB* (*bpeB*) and *BpeEF-OprC* (*bpeF*) expression in eight laboratory-generated *Burkholderia pseudomallei* Bp82-derived mutants containing regulator mutations relative to WT Bp82. Error bars denote standard deviation between biological triplicates, which were all performed in technical triplicates. Efflux pump expression was normalized against the conserved gene, *mmsA* (43). The y axis represents the relative times (x) change in *amrB*, *bpeB* and *bpeF* expression. Statistical analysis was done by two-way ANOVA and Tukey's multiple-comparison test. \*\*\*\*,  $p < 0.0001$ ; \*\*\*,  $p < 0.001$ .

190 taining mutations affecting the *bpeT*, *bpeS* or *amrR* efflux pump regulators (Figure  
 191 4). The three *bpeT* missense mutants, Bp82.268 BpeT<sub>C310R</sub>, Bp82.269 BpeT<sub>L265R</sub>  
 192 and Bp82.270 BpeT<sub>S280P</sub>, exhibited *bpeF* upregulation of 28x (4.8-fold), 38x (5.2-fold)  
 193 and 73x (6.1-fold), respectively, but no significant upregulation of the other two efflux  
 194 pumps. The two *bpeS* missense mutants, Bp82.284 BpeS<sub>P285</sub> and Bp82.285 BpeS<sub>K267T</sub>,  
 195 exhibited upregulation of *bpeF* of 89x (6.5-fold) and 145x (7.2-fold), respectively. In  
 196 Bp82.284 BpeS<sub>P285</sub>, *bpeB* was also moderately upregulated (~3x; 1.5-fold). Upregula-  
 197 tion of *amrB* was confirmed in the two *amrR* mutants Bp82.412 *AmrR*<sub>S174P</sub> (6x; 2.6-fold)  
 198 and Bp82.410 Δ*amrR* (7x; 2.8-fold), with no demonstrable differential expression of  
 199 *bpeB* and *bpeF*. Lastly, in Bp82.280 Δ(*amrAB-oprA*) Δ*bpeR*, the triplex qPCR assay showed  
 200 no *amrB* amplification due to deletion of this locus, but 5x (2.3-fold) upregulation of  
 201 *bpeB* due to deletion of *bpeR*. In all instances where amplicons were produced, triplex  
 202 assay amplification for the isogenic Bp82 mutants was within the LoQ of the triplex  
 203 assay.

## 204 DISCUSSION

205 Despite dramatic improvements in survival rates over the past 30 years, melioidosis  
 206 continues to have a stubbornly high fatality rate, with between 10 and 40% of treated  
 207 cases in the hyperendemic regions of northern Australia and Northeast Thailand,  
 208 respectively, resulting in death (32). It is becoming clearer that at least some of these  
 209 cases can be linked to the development of previously unrecognized resistance or  
 210 decreased susceptibility towards clinically relevant antibiotics (17, 22, 33, 34). Of most  
 211 concern, antibiotic resistance in *B. pseudomallei* has now been documented towards  
 212 almost all antibiotics (17). Identification of an increasing number of novel acquired  
 213 antibiotic resistance mechanisms in clinical *B. pseudomallei* strains, together with the

Webb et al.

214 broadening global presence of melioidosis-endemic regions, has increased the urgency  
215 for methods that can provide rapid detection of emerging antibiotic resistance.

216 In *B. pseudomallei*, antibiotic resistance determination currently relies on culture-  
217 based diagnostics including inhibition zone measurement (e.g. Etests) or serial dilu-  
218 tions of the antibiotic in culture media (e.g. broth or agar microdilutions) (35). Despite  
219 culture-based methods being accurate, they have lengthy turn-around-times, and do  
220 not determine the genetic basis of resistance, both of which are important considera-  
221 tions when determining optimal therapeutic strategies. Nucleic-acid based detection  
222 methods such as real-time PCR have the potential to circumvent many shortcomings  
223 of traditional culture-based methods, offering more rapid turn-around times and de-  
224 termination of the underlying resistance mechanism, which is essential for identifying  
225 potential cross-resistance mechanisms (33, 36) or stepwise progression towards high-  
226 level resistance development (23, 37, 38). Information generated from such assays has  
227 the potential to inform optimal treatment strategies for melioidosis patients in near  
228 real-time and reduce the number of cases where undiagnosed antibiotic resistance  
229 emerges during treatment (39).

230 RND efflux pump upregulation is common in *B. pseudomallei* strains that exhibit  
231 decreased susceptibility towards clinically relevant antibiotics. This mechanism can  
232 either by itself, or in concert with additional mutations, cause resistance towards DOX,  
233 SXT, and MEM (17, 22, 23, 24), three invaluable antibiotics in melioidosis treatment  
234 regimens. Therefore, the main goal of this study was to design, optimize and validate a  
235 triplex qPCR probe-based assay targeting the AmrAB-OprA, BpeAB-OprB, and BpeEF-  
236 OprC RND efflux pumps in *B. pseudomallei* (40). Several nucleic acid-based assays  
237 have been designed for the identification of antibiotic resistance in *B. pseudomallei*  
238 (26, 33, 34, 41, 42); however, all are in singleplex format, making them unattractive for  
239 characterizing more than a handful of antibiotic resistance-conferring mutations. In  
240 contrast, probe-based PCR methods can simultaneously identify multiple targets in a  
241 single assay while being efficient, affordable, sensitive and specific.

242 Given the large number of mutations that can cause RND efflux pump upregu-  
243 lation (17, 22, 23, 28, 43), we opted for a multiplex probe-based assay format that  
244 identifies increased gene expression in favor of designing individual assays targeting  
245 each regulatory mutation, the latter of which would be both impractical (due to the  
246 large number of assays required) and prone to false negatives (due to the high likeli-  
247 hood of missing novel variants). In addition, detecting RNA expression ensures that  
248 efflux pump upregulation is identified without requiring a thorough understanding  
249 of the underlying regulatory networks. We first optimized the three highly specific  
250 efflux pump qPCR assays in both the singleplex and triplex formats, with all assays  
251 demonstrating high robustness and sensitivity levels, similar to the highly robust *B.*  
252 *pseudomallei* *mmsA* probe-based assay (31). Following optimization, we tested the  
253 triplex qPCR assay on 16 clinical and laboratory-generated *B. pseudomallei* mutants that  
254 had alterations in *amrR*, *bpeR*, *bpeT* or *bpeS* and which exhibited resistance towards  
255 DOX or SXT or had decreased MEM susceptibilities. We demonstrated that the triplex  
256 qPCR assay accurately quantified upregulation of efflux in all 16 regulatory mutants.  
257 Our findings confirm the value of the triplex qPCR assay for the detection of RND efflux  
258 pump upregulation.

259 The mechanisms conferring DOX and SXT resistance, and decreased MEM sus-  
260 ceptibility, have recently been unraveled in *B. pseudomallei*. Importantly, all resistant  
261 strains analyzed to date have upregulated efflux pump expression (17, 22, 23, 24). Our  
262 study confirmed that upregulation of *amrB*, *bpeB* or *bpeF* was always associated with  
263 decreased MEM susceptibility. Thus, in a clinical setting, the triplex assay can be used



Detection of efflux pump upregulation in *B. pseudomallei*

264 for the accurate detection of *B. pseudomallei* isolates exhibiting decreased MEM sus-  
265 ceptibility without the need for MIC determination. In contrast, additional mutations  
266 outside of efflux pump regulatory regions, which affect either the methyltransferase,  
267 *BPSL3085*, or the tetrahydrofolate synthesis pathway-linked enzyme pterin reductase,  
268 *folM/ptr1*, are required for the shift towards high-level DOX and SXT resistance (23, 24).  
269 The two-step nature of these mechanisms means that the triplex qPCR assay alone  
270 cannot be used to definitively determine if a strain is resistant to DOX or SXT. However,  
271 the assay can be used to rule out antibiotic resistance, as a strain with little or no  
272 efflux activity is highly likely to be sensitive to these drugs. Importantly, the ability  
273 to rapidly screen isolates and detect precursor mutations to clinically relevant DOX  
274 and SXT resistance provides a unique opportunity for health practitioners to make  
275 informed decisions regarding the suitability of current treatment, and to be aware of  
276 the risk of future resistance emergence towards these antibiotics. If increased efflux  
277 pump activity is detected in any *B. pseudomallei* strain, we strongly recommend that  
278 isolates be subjected to further MIC testing and/or the patient's treatment regimen  
279 altered to avoid selecting for resistance emergence and subsequent treatment failure.

280 It has been previously shown that MEM induces the expression of AmrAB-OprA  
281 in *amrR*-mutated *B. pseudomallei* strains, leading to decreased MEM susceptibility  
282 (17). In the current study, the triplex qPCR assay confirmed that some, but not all,  
283 *amrR* mutants required MEM for the induction of AmrAB-OprA upregulation. In con-  
284 trast, the two tested WT strains, MSHR5864 and MSHR3763, did not show an in-  
285 crease in the expression of *amrB* in the presence of MEM. Efflux pump expression  
286 was inducible in strains encoding in-frame, four-residue *amrR* deletions (MSHR4083  
287 AmrR $_{\Delta A153-D156}$  and MSHR6755 AmrR $_{\Delta V60-C63}$ ), and when *amrR* was completely lost  
288 (MSHR6755  $\Delta amrR$ ); however, induction was not required for two strains encoding  
289 either a point mutation (MSHR0292 AmrR $_{S174P}$ ) or a premature stop codon (MSHR0052  
290 AmrR $_{E190*}$ ). The reason for this difference is not yet fully understood. One possibility  
291 is that RND efflux pump regulatory genes are capable of binding to substrates of the  
292 efflux systems that they regulate, and in doing so, dissociate from their promoter  
293 regions, leading to efflux pump upregulation (44, 45). This hypothesis may explain  
294 the molecular mechanism in the strains that encode the in-frame *amrR* deletions.  
295 However, this concept cannot be applied to the strain lacking *amrR*, as the regulator is  
296 not present, which would lead to efflux pump expression even in the absence of MEM.  
297 Although not examined in this study, it is possible that a second, as-yet-undiscovered  
298 regulator may also be involved in *amrAB-oprA* regulation. Alternately, certain mutation  
299 types or methylation patterns may reverse the function of AmrR, resulting in activation  
300 rather than repression of the operon. Further work using methods such as transcrip-  
301 tomics (RNA-seq) or bisulfite sequencing (methyl-seq) would be needed to confirm this  
302 hypothesis. Based on our results, we recommend that a sub-inhibitory concentration  
303 of MEM (i.e. 0.25  $\mu\text{g/mL}$ ) is sufficient to induce RND efflux pump upregulation in strains  
304 with decreased MEM susceptibility, without impacting RND efflux pump expression in  
305 WT strains. Although not investigated here, MEM may not be required for induction  
306 if RNA is extracted directly from clinical samples due to the preservation of native  
307 expression/methylation profiles, or even the presence of MEM *in vivo* upon sample  
308 collection.

309 There are some recognized limitations to our study. First, there are greater diffi-  
310 culties associated with handling RNA compared with DNA due to the high lability of  
311 bacterial mRNA if not protected appropriately (46). This requirement limits the applica-  
312 tion of our assay to freshly collected specimens, appropriately preserved material, or  
313 viable cultures. Second, we only assessed the use of our triplex assay on RNA extracted

Webb et al.

314 from subcultured isolates, and our TRIzol-based RNA extraction method is relatively  
315 slow ~4h from pelleted culture to purified and quality-controlled RNA). These factors  
316 pose a significant barrier to the rapid diagnosis of RND efflux pump upregulation. An  
317 assessment of rapid RNA extraction methods from bacterial cultures, or ideally, directly  
318 from clinical specimens (47, 48), is needed to achieve same-day identification of strains  
319 with increased RND efflux expression. Finally, the complex nature of antibiotic resis-  
320 tance mechanisms may act as a barrier to the uptake of molecular antibiotic resistance  
321 assays in clinical laboratories due to an unfamiliarity with molecular techniques or  
322 difficulties in communicating results among healthcare professionals. The latter issue  
323 can be overcome with the availability of report templates, such as the *Mycobacterium*  
324 *tuberculosis* template for antibiotic resistance determination in tuberculosis patients  
325 based on WGS data, which communicates molecular results from antibiotic resistance  
326 strains to health practitioners in a clear and unambiguous manner, and without the  
327 need for specialized molecular knowledge (49).

## 328 CONCLUSIONS

329 *B. pseudomallei* is an important mammalian pathogen that is endemic in most tropical  
330 and many subtropical regions. As new endemic regions continue to be unveiled, and  
331 as better recognition of this neglected pathogen filters through to the clinical setting,  
332 the number of melioidosis cases reported globally is expected to increase dramatically.  
333 Due to the high mortality rate of this disease even with antibiotic treatment, patient  
334 management should include regular screening of clinical isolates for the emerging  
335 development of antibiotic resistance to ensure optimal treatment strategies are being  
336 implemented, and to minimize the possibility of unintended treatment failure. With  
337 this goal in mind, we developed and optimized a triplex qPCR assay that simultaneously  
338 detects the expression of AmrAB-OprA, BpeAB-OprA and BpeEF-OprC in *B. pseudo-*  
339 *mallei* isolates. The triplex assay was tested on a panel of genetically characterized  
340 *B. pseudomallei* isolates of both clinical and laboratory origin, with known mutations  
341 leading to SXT or DOX resistance, or decreased MEM susceptibilities. In all *B. pseudo-*  
342 *mallei* strains that contained regulatory mutations, upregulation of at least one efflux  
343 pump was accurately detected. Rapid and facile detection of efflux upregulation is a  
344 crucial component of detecting emerging drug resistance in *B. pseudomallei*, and will  
345 aid in prompt and effective administration of individualized treatment regimens for  
346 melioidosis patients.

## 347 MATERIALS AND METHODS

348 **Ethics statement.** This study was approved by the Human Research Ethics Committee  
349 of the Northern Territory Department of Health and the Menzies School of Health  
350 Research (HREC 02/38).

351 **Melioidosis patients and corresponding *B. pseudomallei* clinical isolates.** Eight  
352 Australian melioidosis cases were examined in this study. Seven cases have previously  
353 been described, including one (Pre-DPMS 89) that lacks a wild-type (WT) isogenic pair.  
354 Prior comparative genomic analysis and functional characterization showed that all  
355 non-WT strains from these patients encode RND efflux pump regulatory mutations  
356 that cause increased MICs (either resistance or decreased susceptibility) towards SXT,  
357 DOX or MEM (16, 17, 22, 23).

358 During this study, an adult patient, P1048, presented with acute pneumonia to  
359 Royal Darwin Hospital, Northern Territory, Australia. Initial treatment involved MEM  
360 for four weeks, followed by six weeks of CAZ and then a three-month eradication  
361 course of DOX due to SXT intolerance (neutropenia). MSHR9766 was cultured from

## Detection of efflux pump upregulation in *B. pseudomallei*

sputum upon initial admission, and MSHR9872 was cultured from sputum during the final week of MEM treatment. P1048 reverted to being culture-negative after two months of treatment, and has since recovered from their infection. MIC testing showed that MSHR9766 was sensitive to MEM (1 µg/mL), whereas MSHR9872 had decreased susceptibility towards MEM (7 µg/mL), although both isolates were sensitive towards the other clinically relevant antibiotics (DOX, SXT and CAZ). Due to the development of an elevated MEM MIC in a latter isolate from this patient, we included this patient in our study.

The strain details for these eight cases, including regulatory mutations and MIC data, are shown in Table 1. Additionally, an *amrR* knockout of the final isolate retrieved from Patient 726 (MSHR6755  $\Delta amrR$ ), which was previously created via allelic exchange (17), was included in the present study to determine the effect of regulator loss on efflux expression profiles.

***B. pseudomallei* growth conditions and MIC determination.** All clinical strains were grown on Luria-Bertani (LB) agar or in LB broth (Oxoid, Thebarton, SA, Australia) at 37°C for 24h unless otherwise stated. For the select agent-excluded strain Bp82 (50) and its derivatives, media were supplemented with 80 µg/mL adenine (Sigma, St. Louis, MO, USA), and for MIC testing of Bp82-derived strains, Mueller-Hinton (MH) agar or broth was supplemented with 40 µg/mL adenine. *Escherichia coli* strains DH5 $\alpha$  and RHO3 were used for plasmid DNA manipulation or mobilization, respectively, and were grown according to previously published methods (51, 52). Antimicrobial susceptibility testing was performed using Etests according to the manufacturer's instructions (bioMérieux, Baulkham Hills, NSW, Australia). Resistance cut-offs were based on the Clinical and Laboratory Standards Institute (CLSI) guidelines, as follows: CAZ  $S \leq 8$ ,  $I = 16$  and  $R \geq 32$  µg/mL; DOX:  $S \leq 4$ ,  $I = 8$  and  $R \geq 16$  µg/mL; and SXT:  $S \leq 2/38$  and  $R \geq 4/76$  µg/mL (53). The CLSI guidelines do not list MIC values for *B. pseudomallei* towards MEM; thus we categorized decreased MEM susceptibility as MICs  $\geq 3$  µg/mL based on prior studies (17, 54, 55). All experiments with clinical *B. pseudomallei* isolates were performed in a physical containment level 3 (biosafety level 3) facility according to local regulations, whereas experiments involving strain Bp82 and its derivatives were conducted in the physical containment level 2 laboratory, as Bp82 is excluded from select agent regulations due to an attenuated virulence phenotype conferred by a  $\Delta purM$  mutation ([www.selectagents.gov/SelectAgentsandToxinsExclusions.html](http://www.selectagents.gov/SelectAgentsandToxinsExclusions.html)).

***B. pseudomallei* Bp82 efflux pump regulator mutants.** Eight *B. pseudomallei* Bp82 strains with efflux pump regulatory mutations were included, six of which have been previously created (24): Bp82.268 BpeT<sub>C310R</sub>, Bp82.269 BpeT<sub>L265R</sub>, Bp82.270 BpeT<sub>S280P</sub>, Bp82.284 BpeS<sub>P29S</sub>, Bp82.285 BpeS<sub>K267T</sub> and Bp82.280  $\Delta(amrAB-oprA) \Delta bpeR$ . These Bp82 mutants, with the exception of Bp82.280  $\Delta(amrAB-oprA) \Delta bpeR$ , were created via site-directed mutagenesis and knockouts to investigate the mechanisms of SXT resistance in *B. pseudomallei* using previously described methods (24). Bp82.280  $\Delta(amrAB-oprA) \Delta bpeR$  was derived from a previously created strain (Bp82.27) as previously described (27, 56) leaving a Flp recombinase target (FRT) scar in the *bpeR* gene. MIC data for the Bp82 mutants are detailed in Table 1.

**Construction of two novel Bp82 *amrR* mutants.** We have recently shown that a T520C point mutation in *amrR* (AmrR<sub>S174P</sub>) in an Australian clinical *B. pseudomallei* isolate plays an important role in increasing the MIC towards DOX (1 to 16 µg/mL) (23). Two laboratory-generated Bp82 *amrR* mutants (Bp82.410  $\Delta amrR$  and Bp82.412 AmrR<sub>S174P</sub>) were therefore created in this study to better understand the effect of *amrR* mutations on *amrAB-oprA* expression. Deletion of *amrR* was achieved using the pEXKm5-based allelic replacement system (51) (Table 2). Briefly, the US and DS region

**TABLE 1** *Burkholderia pseudomallei* clinical isolates and laboratory-generated mutants used in this study. Mutations in resistance-nodulation-division efflux regulatory genes are indicated. Minimum inhibitory concentrations (MICs; µg/mL) for wild-type and mutant strains are shown for each antibiotic. MICs above the intermediate (i) or resistant (r) threshold determined for *B. pseudomallei* are indicated.

| Patient                 | Strain   | Regulatory mutation               | DOX    | TMP  | SMX | SXT     | CAZ      | MEM <sup>a</sup> | Study      |
|-------------------------|----------|-----------------------------------|--------|------|-----|---------|----------|------------------|------------|
| <b>Clinical strains</b> |          |                                   |        |      |     |         |          |                  |            |
| Pre-DPMS 89             | MSHR0052 | AmrR <sub>E190</sub> <sup>b</sup> | 48 (r) | ND   | ND  | ND      | ND       | 8 (i)            | (17)       |
| Non-DPMS 00             | MSHR0293 | WT                                | 1      | ND   | ND  | 0.38    | 1        | 0.5              | (23)       |
|                         | MSHR0292 | AmrR <sub>S174P</sub>             | 16 (r) | ND   | ND  | 0.50    | 1        | 2                |            |
| CF6                     | MSHR5651 | WT                                | 0.38   | ND   | ND  | 0.75    | 1.5      | 0.5              | (22)       |
|                         | MSHR5654 | BpeT <sub>T314fs</sub>            | 3      | ND   | ND  | >32 (r) | >256 (r) | 2                |            |
| P215                    | MSHR0664 | WT                                | ND     | ND   | ND  | 2       | 0.75     | 1.5              | (17)       |
|                         | MSHR0937 | BpeR <sub>N176A</sub>             | 4      | ND   | ND  | 2       | 8        | 6 (i)            |            |
| P1048                   | MSHR9766 | WT                                | ND     | ND   | ND  | ND      | ND       | 0.5              | This study |
|                         | MSHR9872 | AmrR <sub>G50E</sub>              | ND     | ND   | ND  | ND      | ND       | 6 (i)            |            |
| P797                    | MSHR6522 | WT                                | 1      | ND   | ND  | 1.5     | 1.5      | 0.5              | (17)       |
|                         | MSHR7929 | AmrR <sub>E30D</sub>              | 2      | ND   | ND  | 4 (r)   | 1.5      | 4                |            |
| P608                    | MSHR3763 | WT                                | 0.75   | ND   | ND  | 3 (i)   | 2        | 0.75             | (17)       |
|                         | MSHR4083 | AmrR <sub>ΔA153-D156</sub>        | 1      | ND   | ND  | 24 (r)  | 2        | 6 (i)            |            |
| P726                    | MSHR5864 | WT                                | 1      | ND   | ND  | 1.5     | 1.5      | 0.75             | (17)       |
|                         | MSHR6755 | AmrR <sub>ΔV60-C63</sub>          | 1.5    | ND   | ND  | 0.75    | 1.5      | 3                |            |
|                         | MSHR6755 | Δ <i>amrR</i>                     | ND     | ND   | ND  | ND      | ND       | 3                |            |
| <b>Bp82 mutants</b>     |          |                                   |        |      |     |         |          |                  |            |
| N/A                     | Bp82     | WT                                | 0.5    | 0.75 | 4   | 0.094   | 2        | ND               | (50)       |
| N/A                     | Bp82.268 | BpeT <sub>C310R</sub>             | 2      | 4    | 8   | 0.38    | 2        | ND               | (24)       |
| N/A                     | Bp82.269 | BpeT <sub>L265R</sub>             | 1      | 4    | 8   | 0.38    | 2        | ND               | (24)       |
| N/A                     | Bp82.270 | BpeT <sub>S280P</sub>             | 8      | >32  | ND  | ND      | 2        | ND               | (24)       |
| N/A                     | Bp82.284 | BpeS <sub>P29S</sub>              | 2      | >32  | ND  | ND      | 2-4      | ND               | (24)       |
| N/A                     | Bp82.285 | BpeS <sub>K267T</sub>             | 8      | >32  | ND  | ND      | 1-2      | ND               | (24)       |
| N/A                     | Bp82.280 | ΔAmrAB-OprA ΔBpeR                 | 1      | 0.75 | ND  | ND      | 2        | ND               | (24, 27)   |
| N/A                     | Bp82.410 | ΔAmrR                             | 4      | 0.75 | ND  | ND      | 2        | ND               | This study |
| N/A                     | Bp82.412 | AmrR <sub>S174P</sub>             | 4      | 0.75 | ND  | ND      | 2        | ND               | This study |

Abbreviations: r, resistant; i, intermediate resistance; fs, frameshift mutation; ND, not determined; WT, wild type; DOX, doxycycline; TMP, trimethoprim; SMX, sulfamethoxazole; SXT, trimethoprim-sulfamethoxazole; CAZ, ceftazidime; MEM, meropenem.

<sup>a</sup>Clinical & Laboratory Standards Institute (CLSI) breakpoints for MEM have yet to be determined. Therefore, cut-offs are instead included for the related carbapenem antibiotic, imipenem.

<sup>b</sup>nonsense mutation leading to a premature stop codon.

Detection of efflux pump upregulation in *B. pseudomallei*

**TABLE 2** Plasmids used in the study.

| Plasmid                                    | Description                                                                                                  | Source     |
|--------------------------------------------|--------------------------------------------------------------------------------------------------------------|------------|
| pEXKm5                                     | Km <sup>r</sup> ; allelic-exchange plasmid                                                                   | (51)       |
| pEXKm5-US-DS-amrR                          | Km <sup>r</sup> ; pEXKm5 with US-DS- <i>amrR</i>                                                             | This study |
| pEXKm5-US-DS-amrRT520C                     | Km <sup>r</sup> ; pEXKm5 with US-DS- <i>amrR</i> <sub>T520C</sub> <sup>a</sup>                               | This study |
| pGEM-T Easy                                | Ap <sup>r</sup> ; PCR amplicon cloning vector                                                                | Promega    |
| pGEM-T-US-DS-WT- <i>amrR</i>               | Ap <sup>r</sup> ; pGEM-T Easy with US-DS-WT- <i>amrR</i> PCR fragment from Bp82                              | This study |
| pGEM-T-US-DS- <i>amrR</i> <sub>T520C</sub> | Ap <sup>r</sup> ; pGEM-T Easy with US-DS- <i>amrR</i> <sub>T520C</sub> created via site directed mutagenesis | This study |

Abbreviations: US, upstream; DS, downstream; Km<sup>r</sup>, kanamycin resistant; Ap<sup>r</sup>, ampicillin resistant; WT, wild-type.

<sup>a</sup>the T520C mutation corresponds to the S174P mutation present in MSHR0292.

of *amrR* was amplified by PCR (using Bp82 genomic DNA as template) using primers amrR\_UP\_F, amrR\_UP\_R, amrR\_DN\_F and amrR\_DN\_R (Table 3). The PCR fragments were purified and assembled into pEXKm5 to create pEXKm5-US-DS-*amrR* (Table 2), using NEBuilder High-Fidelity DNA Assembly system (New England Biolabs, Ipswich, MA, USA). pEXKm5-US-DS-*amrR* was subsequently conjugated into Bp82 using an *E. coli* RHO3 mobilizer strain (51). Finally, merodiploids were selected for and resolved. The resultant  $\Delta$ *amrR* strain was named Bp82.410. Loss of *amrR* was confirmed by PCR amplification using the primers amrR\_Fullgene\_F and amrR\_Fullgene\_R (Table 3), with the amplified size of WT *amrR* being 1,472bp compared with the *amrR* knockout at 800bp. For construction of strain Bp82.412 expressing AmrR<sub>S174P</sub>, the entire *amrR* gene including 400 bp upstream sequence (US) and 400 bp downstream sequence (DS) was first ligated into pGEM-T Easy (Promega, Madison, WI, USA) (Table 2) to create pGEM-T-US-DS-WT-*amrR* (Table 2) using primers amrR\_Fullgene\_F and amrR\_Fullgene\_R (Table 3). Site-directed mutagenesis was performed using pGEM-T-US-DS-WT-*amrR* together with the *amrR* mutagenic primers amrR\_T520C\_F and amrR\_T520C\_R (Table 3) to create pGEM-T-US-DS-*amrR*<sub>T520C</sub> (Table 2) following the manufacturer's instructions (QuikChange II Site-Directed Mutagenesis Kit, Agilent Technologies, Santa Clara, CA, USA). The US-DS-*amrR*<sub>T520C</sub> fragment was subcloned into the *EcoRI* site of pEXKm5 creating pEXKm5-US-DS-*amrR*<sub>T520C</sub> (Table 2). Mutagenesis was confirmed by dideoxy nucleotide sequencing of the newly introduced amrR<sub>T520C</sub>. The mutagenic plasmid pEXKm5-US-DS-*amrR*<sub>T520C</sub> was then introduced into Bp82.410  $\Delta$ *amrR* as described using *E. coli* RHO3 (51), followed by allelic exchange. Merodiploids were selected for and resolved to create Bp82.412 (Bp82 AmrR<sub>S174P</sub>).

**Genomic analyses.** We have previously used a comparative genomics approach to identify genetic variants in seven cases (16, 17, 22, 23). This same approach was also employed to identify variants between isolates obtained from a new melioidosis case, P1048, which arose during the course of our study. Reference-based assembly of the initial P1048 isolate, MSHR9766, was performed with MGAP v1.0 (<https://github.com/dsarov/MGAP—Microbial-Genome-Assembler-Pipeline>), using the closed genome of Australian strain MSHR1153 (57) for scaffolding. The MSHR9766 assembly was error-corrected by self-read mapping to correct for a small number of single-nucleotide polymorphism (SNP) and insertion-deletion (indel) errors. The corrected assembly was subsequently used as a reference to identify genetic variants (SNPs, indels, copy number variants) between the P1048 strains, and to rule out gene loss in the latter strain. Read mapping was carried out using BWA (58), SAMTools (59), GATK (60) and SnpEff (61), which are wrapped in the SPANDx pipeline v3.2.1 (62). Default SPANDx settings were used, with the flag for indel detection (-i) enabled. A second analysis using the Thai clinical strain *B. pseudomallei* K96243 (63) as the reference



Webb et al.

**TABLE 3** Primers and probes used for *amrR* knockout, site-directed mutagenesis and detection of efflux pump upregulation.

| Primers/Probe                                           | Sequence (5'-3')                            |
|---------------------------------------------------------|---------------------------------------------|
| <b>Deletion of <i>amrR</i></b>                          |                                             |
| <i>amrR</i> _UP_F                                       | CCTGTTATCCCTACCCGGGCTCCTGCCCTTCTCGTAGG      |
| <i>amrR</i> _UP_R                                       | CAGTGC CGTGGGGGGGTGCTCCCTTA                 |
| <i>amrR</i> _DN_F                                       | CACCCCCC CACGCGCACTGAACGCGCA                |
| <i>amrR</i> _DN_R                                       | GGGATAACAGGGTAATCCCGGCGGGCGGAAGAAACGGAAAC   |
| <b>Amplification of <i>amrR</i> + 400bp US &amp; DS</b> |                                             |
| <i>amrR</i> _Fullgene_F                                 | TCCTGCCCTTCTCGTAG                           |
| <i>amrR</i> _Fullgene_R                                 | GCGGGCGGAAGAAACGGA                          |
| <b>Site directed mutagenesis of <i>amrR</i> T520C</b>   |                                             |
| <i>amrR</i> _T520C_F                                    | TGGTCCAGATCATCGGGCCGAAGATGCCTTC             |
| <i>amrR</i> _T520C_R                                    | GAAGGCATCTTCGGCCCGATGATCTGGACCA             |
| <b>Triplex efflux assay</b>                             |                                             |
| <i>amrB</i> _For_1                                      | TGTTTCGCATGGGTGATCTCC                       |
| <i>amrB</i> _Rev_1                                      | GACCGATTCTCGACGACCT                         |
| <i>amrB</i> _BHQ_Probe_1                                | FAM-TGTTTCATCATGCTGGGCGGCATC-BHQ1           |
| <i>bpeB</i> _For_1                                      | GCCGTCGATCCAGATCACC                         |
| <i>bpeB</i> _Rev_1                                      | TGCTCGATCACCTGCGTG                          |
| <i>bpeB</i> _BHQ_Probe_1                                | JOE-TTCGGCGAAGACCGTCGAAGACAC-BHQ1           |
| <i>bpeF</i> _For_1                                      | TGACGTATCTGCGCAACTACG                       |
| <i>bpeF</i> _Rev_1                                      | TGCGGATCGAGCCACAC                           |
| <i>bpeF</i> _BHQ_Probe_1                                | Quasar 670-CTCATCAACGTGAAGGATCGCCTGTAC-BHQ3 |

Abbreviations: BHQ, black hole quencher; US, upstream; DS, downstream.

genome was performed to enable accurate variant annotation.

**RNA extractions and cDNA synthesis.** To determine expression levels of the three RND efflux pumps, *B. pseudomallei* clinical strains and mutants were grown to mid-log phase ( $OD_{600} = 0.8$  to 1) in LB broth for RNA extraction unless otherwise stated. For two *B. pseudomallei* isogenic pairs (MSHR5864 and MSHR6755; MSHR3763 and MSHR4083) and an AmrR knockout (MSHR6755  $\Delta amrR$ ), LB was supplemented with 0.25  $\mu\text{g}/\text{mL}$  MEM (Sigma-Aldrich, Castle Hill, NSW, Australia); all other strains were grown in the absence of antibiotics. For the clinical *B. pseudomallei* pairs, biological replicates of total RNA were extracted using TRIzol according to the manufacturer's instructions (Thermo Fisher Scientific, Scoresby, VIC, Australia). RNA samples were treated with TURBO DNase (Thermo Fisher Scientific) prior to cDNA conversion using the QuantiTect Reverse Transcription Kit (Qiagen, Chadstone, VIC, Australia). Eradication of contaminating DNA prior to cDNA synthesis was confirmed with real-time PCR on the RNA extracts without the inclusion of reverse transcriptase to ensure no amplification. For the Bp82 mutants, biological triplicates of total RNA were extracted using the RNeasy Protect Bacteria kit according to the manufacturer's instructions (Qiagen), followed by DNase treatment (Fermentas, Waltham, MA, USA) and cDNA conversion using the SuperScript III First-Strand Synthesis SuperMix (Thermo Fisher Scientific).

**Triplex assay design and quantitative PCR conditions.** For the quantification of AmrAB-OprA, BpeAB-OprB and BpeEF-OprC expression, a triplex assay was designed to detect the RND transporter genes (*amrB*, *bpeB* and *bpeF*) of these efflux pumps. Primers and probes were designed using Primer Express software v3.0.1 (Applied Biosystems, Scoresby, VIC, Australia) and checked for specificity and binding efficiency

Detection of efflux pump upregulation in *B. pseudomallei*

473 using MegaBLAST. NetPrimer (<http://www.premierbiosoft.com/netprimer/>) was used to  
474 guide oligo design to avoid primer dimer artefacts, with a within-assay cross- and self-  
475 dimer ( $\Delta G$ ) cut-off of -10 or higher deemed acceptable. Each assay was first performed  
476 and optimized in singleplex format, with probes initially being labeled with the FAM  
477 dye, before converting the assays to a triplex-compatible format using three spectrally  
478 distinct dyes: 5'-FAM-amrB-BHQ-1-3', 5'-JOE-bpeB-BHQ-1-3' and 5'-Quasar670-bpeF-  
479 BHQ-1-3'. For *amrB* and *bpeB*, 0.35 $\mu$ M of each primer was used (*amrB*-For\_1, *amrB*-  
480 Rev\_1, *bpeB*-For\_1, *bpeB*-Rev\_1) with 0.2 $\mu$ M of *bpeF* primers, together with 0.25 $\mu$ M of  
481 each Black Hole Quencher probe (LGC Biosearch Technologies, Petaluma, CA, USA) and  
482 1 X TaqMan Environmental PCR Master Mix (Applied Biosystems).

483 Two conserved genes were used as controls for normalizing efflux pump gene  
484 expression. For all isolates, the TaqMan MGB probe-based *mmsA* (*BPSS0619*; also  
485 known as 266152) assay, which targets methylmalonate-semialdehyde dehydrogenase  
486 (31), was used. The *mmsA* PCRs were carried out using either 384-well optical plates  
487 on the QuantStudio 6 Flex Real-Time PCR system (Thermo Fisher Scientific), or in 96-  
488 well optical plates using the CFX96 Touch Real-Time PCR detection system (Bio-Rad,  
489 Hercules, CA, USA). The limits of detection (LoD) and quantitation (LoQ) for the *mmsA*  
490 assay have previously been determined as 4 fg, or 0.5 genomic equivalents (GEs),  
491 which is the equivalent of a single PCR template (31), making this assay attractive for  
492 low-concentration target quantification. For efflux pump gene normalization in eight  
493 Bp82 mutants, a 23S rDNA assay was also used as described elsewhere (27). For 23S  
494 qPCRs, 0.2  $\mu$ M of each primer was used with 2 X SYBR Select Mastermix (Thermo Fisher  
495 Scientific). The following conditions were used for thermocycling: enzyme activation  
496 for 2 min at 50°C, initial denaturation at 95°C for 10 min, followed by 45 cycles of  
497 denaturation at 95°C for 15 sec and annealing for 1 min at 60°C. The auto setting was  
498 used on each instrument when determining the threshold for each of the three assays  
499 in the triplex format.

500 **Triplex assay performance.** The performance of the triplex qPCR assay was  
501 tested across several criteria to determine the LoQ, LoD and linearity (efficiency) follow-  
502 ing previously published methods (31, 29). Briefly, genomic DNA from *B. pseudomallei*  
503 MSHR4420 was used as template due to this sample being reasonably concentrated  
504 (286 ng/ $\mu$ L according to NanoDrop 2000 [Thermo Fisher Scientific] spectrophotometric  
505 analysis), of high quality and from a recent extraction. To establish the LoQ, LoD and  
506 linearity, 1:10 serial dilutions of *B. pseudomallei* MSHR4420 ranging from 40 to 4x10<sup>-6</sup>  
507 ng across eight replicates at each concentration were used as PCR template. Genomic  
508 equivalents (GEs) were calculated using an average molecular weight of 660 g/mol/bp  
509 and a 7.2 Mbp genome size.

510 **Triplex qPCR assay use and statistics.** The triplex qPCR assay was performed on  
511 the 15 clinical strains, and eight Bp82 laboratory-generated mutants that contained  
512 regulator mutations. Average relative expression values (calculated as both times  
513 (x) change and log<sub>2</sub> fold change in expression) were calculated based on biological  
514 replicates or triplicates. The relative expression data was analyzed by two-way analysis  
515 of variance (ANOVA) and Tukey's multiple-comparison test using GraphPad Prism  
516 (GraphPad Software, Inc., La Jolla, CA). *p* values of <0.05 were considered significant.

517 **Availability of data and materials. WGS and accession numbers.** Paired-end Il-  
518 lumina WGS data for the clinical strains MSHR0052, MSHR0664, MSHR0937, MSHR5651,  
519 MSHR5654, MSHR0292, MSHR0293, MSHR6522, MSHR7929, MSHR3763, MSHR4083,  
520 MSHR5864, and MSHR6755 were previously generated to ~80-90x coverage using the  
521 HiSeq2000 or HiSeq2500 platforms (Macrogen Inc., Geumcheon-gu, Seoul, Rep. of Ko-  
522 rea). These reads have been deposited into the Sequence Read Archive database under

Webb et al.

accession numbers SRR5818275, SRR5927082, SRR2886988, SRR3381886, SRR3404570, SRR4254580, SRR4254579, SRR5949104, SRR6075126, SRR2887021, SRR2887030, SRR6075121, and SRR6075122, respectively. Illumina reads for MSHR9766 and MSHR9872 were generated on the NextSeq platform as part of the current study (Macrogen Inc.), and have been deposited under accession numbers SRR6384102 and SRR6384101, respectively.

## SUPPLEMENTAL MATERIAL

**FIG S1.** Supplemental Figure S1: Range of linearity for the *Burkholderia pseudomallei* resistance-nodulation-division efflux pump triplex qPCR assay. A) *bpeB*, B) *amrB* and C) *bpeF*.

**FIG S2.** Supplemental Figure S1: Range of linearity for the *Burkholderia pseudomallei* resistance-nodulation-division efflux pump singleplex qPCR assays. A) *bpeB*, B) *amrB* and C) *bpeF*.

**TABLE S1.** Efflux pump relative expression profiles (AmrAB-OprA [*amrB*], BpeAB-OprB [*bpeB*] and BpeEF-OprC [*bpeF*]) of the Bp82 regulatory mutants. The conserved gene control (*mmsA* and/or 23S rDNA) used for each strain is indicated.

## ACKNOWLEDGMENTS

We would like to thank Linda Viberg, Ammar Aziz, Tegan Harris, Mark Mayo, Vanessa Theobald and Barbara MacHunter (Menzies School of Health Research) for laboratory assistance. This study was funded by the Australian National Health and Medical Research Council (award no. 1098337). JRW gratefully acknowledges the support provided by the Australian Federation of Graduate Women (Barbara Hale Fellowship), which made this work possible. EPP was supported by a University of the Sunshine Coast fellowship, and DSS was funded by an Advance Queensland fellowship (AQR13016-17RD2). Work in the HPS laboratory was funded in part by National Institute of Allergy and Infectious Diseases of the National Institutes of Health (award no. U54 AI065357). The content is solely the responsibility of the authors and does not necessarily represent the official views of the National Institutes of Health. Additional funding to HPS was provided by University of Florida Preeminence start-up funds.

## REFERENCES

1. World Health Organization. Antimicrobial resistance: Global report on surveillance; 2014.
2. Centers for Disease Control and Prevention. Antibiotic resistance: Threats in the United States; 2013.
3. Dance DA, Wuthiekanun V, Chaowagul W, White NJ. The antimicrobial susceptibility of *Pseudomonas pseudomallei*. Emergence of resistance *in vitro* and during treatment. J Antimicrob Chemother 1989; 24(3):295-309. <http://www.ncbi.nlm.nih.gov/pubmed/2681116>.
4. Jenney AW, Lum G, Fisher DA, Currie BJ. Antibiotic susceptibility of *Burkholderia pseudomallei* from tropical northern Australia and implications for therapy of melioidosis. Int J Antimicrob Agents 2001; 17(2):109-13. <http://www.ncbi.nlm.nih.gov/pubmed/11165114>.
5. Tribuddharat C, Moore RA, Baker P, Woods DE. *Burkholderia pseudomallei* class a beta-lactamase mutations that confer selective resistance against ceftazidime or clavulanic acid inhibition. Antimicrob Agents Chemother 2003; 47(7):2082-7. <http://www.ncbi.nlm.nih.gov/pubmed/12821450>.
6. Schweizer HP. Mechanisms of antibiotic resistance in *Burkholderia pseudomallei*: implications for treatment of melioidosis. Futur. Microbiol 2012; 7(12):1389-99. <http://www.ncbi.nlm.nih.gov/pubmed/23231488>.
7. JM W. Melioidosis: The most neglected tropical disease. mBiosphere 2017; 2017(22 09 2017). <https://www.asm.org/index.php/mbiosphere/item/5883-melioidosis-the-most-neglected-tropical-disease>.
8. Limmathurotsakul D, Golding N, Dance DAB, Messina JP, Pigott DM, Moyes CL, Rolim DB, Bertherat E, Day NPJ, Peacock SJ, Hay SI. Predicted global distribution of *Burkholderia pseudomallei* and burden of melioidosis. Nat. Microbiol. 2016; 1(1):15008. <http://dx.doi.org/10.1038/nmicrobiol.2015.8>.
9. Cheng AC, Fisher DA, Anstey NM, Stephens DP, Jacups SP, Currie BJ. Outcomes of patients with melioidosis treated with meropenem. Antimicrob Agents Chemother 2004; 48(5):1763-5. <http://www.ncbi.nlm.nih.gov/pubmed/15105132>.
10. Pitman MC, Luck T, Marshall CS, Anstey NM, Ward L, Currie BJ. Intravenous therapy duration and outcomes in melioidosis: A new treatment paradigm. PLoS Negl Trop Dis 2015; 9(3):e0003586. <http://www.ncbi.nlm.nih.gov/pubmed/25811783>.
11. Piliouras P, Ulett GC, Ashhurst-Smith C, Hirst RG, Norton RE. A comparison of antibiotic susceptibility testing methods for cotrimoxazole with *Burkholderia pseudomallei*. Int J Antimicrob Agents 2002; 19(5):427-9. <http://www.ncbi.nlm.nih.gov/pubmed/12007851>.
12. Wuthiekanun V, Cheng AC, Chierakul W, Amornchai P, Limmathurotsakul D, Chaowagul W, Simpson AJ, Short JM, Wongsuvan G, Maharjan B, White NJ, Peacock SJ. Trimethoprim/sulfamethoxazole resistance in clinical isolates of *Burkholderia pseudomallei*. J Antimicrob Chemother 2005; 55(6):1029-31. <http://www.ncbi.nlm.nih.gov/pubmed/15886263>.

Detection of efflux pump upregulation in *B. pseudomallei*

13. Wuthiekanun V, Peacock SJ. Management of melioidosis. *Expert Rev Anti Infect Ther* 2006; 4(3):445–55. <http://www.ncbi.nlm.nih.gov/pubmed/16771621>.
14. Wuthiekanun V, Amornchai P, Saiprom N, Chantratita N, Chierakul W, Koh GC, Chaowagul W, Day NP, Limmathurotsakul D, Peacock SJ. Survey of antimicrobial resistance in clinical *Burkholderia pseudomallei* isolates over two decades in Northeast Thailand. *Antimicrob Agents Chemother* 2011; 55(11):5388–91. <http://www.ncbi.nlm.nih.gov/pubmed/21876049>.
15. Rakotondrasoa A, Issack MI, Garin B, Vallade E, Wattiau P, Allou N, Belmonte O, Bibi J, Price EP, Collard JM. Melioidosis in the western Indian Ocean and the importance of improving diagnosis, surveillance and molecular typing. *Trop Med Infect Dis* 2018; .
16. Price EP, Smith ML, Paxinos EE, Tallon LJ, Sadzewicz L, Sengamalay N, Baird RW, Currie BJ, Sarovich DS. Whole-Genome sequences of *Burkholderia pseudomallei* isolates exhibiting decreased meropenem susceptibility. *Genome Announc*. 2017; 5(14). <http://www.ncbi.nlm.nih.gov/pubmed/28385830>.
17. Sarovich DS, Webb JR, Pitman MC, Viberg LT, Mayo M, Baird RW, Robson JM, Currie BJ, Price EP. Raising the stakes: Loss of efflux-pump regulation decreases meropenem susceptibility in *Burkholderia pseudomallei*. *Clin Infect Dis*. 2018; <http://dx.doi.org/10.1093/cid/ciy069>.
18. Chan YY, Tan TM, Ong YM, Chua KL. BpeAB-OprB, a multidrug efflux pump in *Burkholderia pseudomallei*. *Antimicrob Agents Chemother* 2004; 48(4):1128–35. <http://www.ncbi.nlm.nih.gov/pubmed/15047512>.
19. Moore RA, DeShazer D, Reckseidler S, Weissman A, Woods DE. Efflux-mediated aminoglycoside and macrolide resistance in *Burkholderia pseudomallei*. *Antimicrob Agents Chemother* 1999; 43(3):465–70. <http://www.ncbi.nlm.nih.gov/pubmed/10049252>.
20. Kumar A, Chua KL, Schweizer HP. Method for regulated expression of single-copy efflux pump genes in a surrogate *Pseudomonas aeruginosa* strain: Identification of the BpeEF-OprC chloramphenicol and trimethoprim efflux pump of *Burkholderia pseudomallei* 1026b. *Antimicrob Agents Chemother* 2006; 50(10):3460–3. <http://www.ncbi.nlm.nih.gov/pubmed/17005832>.
21. Eswaran J, Koronakis E, Higgins MK, Hughes C, Koronakis V. Three's company: component structures bring a closer view of tripartite drug efflux pumps. *Curr Opin Struct Biol* 2004; 14(6):741–7. <https://www.ncbi.nlm.nih.gov/pubmed/15582398>.
22. Viberg LT, Sarovich DS, Kidd TJ, Geake JB, Bell SC, Currie BJ, Price EP. Within-host evolution of *Burkholderia pseudomallei* during chronic infection of seven Australasian cystic fibrosis patients. *MBio* 2017; 8(2). <http://www.ncbi.nlm.nih.gov/pubmed/28400528>.
23. Webb JR, Price EP, Currie BJ, Sarovich DS. Loss of methyltransferase function and increased efflux activity leads to doxycycline resistance in *Burkholderia pseudomallei*. *Antimicrob Agents Chemother* 2017; 61(6). <http://www.ncbi.nlm.nih.gov/pubmed/28348161>.
24. Podnecky NL, Rhodes KA, Mima T, Drew HR, Chirakul S, Wuthiekanun V, Schupp JM, Sarovich DS, Currie BJ, Keim P, Schweizer HP. Mechanisms of resistance to folate pathway inhibitors in *Burkholderia pseudomallei*: Deviation from the norm. *MBio* 2017; 8(5). <http://www.ncbi.nlm.nih.gov/pubmed/28874476>.
25. Price EP, Viberg LT, Kidd TJ, Bell SC, Currie BJ, Sarovich DS. Transcriptomic analysis of longitudinal *Burkholderia pseudomallei* infecting the cystic fibrosis lung. Under review 2018; .
26. Kumar A, Mayo M, Trunck LA, Cheng AC, Currie BJ, Schweizer HP. Expression of resistance-nodulation-cell-division efflux pumps in commonly used *Burkholderia pseudomallei* strains and clinical isolates from northern Australia. *Trans R Soc Trop Med Hyg* 2008; 102 Suppl 1:S145–51. <http://www.ncbi.nlm.nih.gov/pubmed/19121677>.
27. Mima T, Schweizer HP. The BpeAB-OprB efflux pump of *Burkholderia pseudomallei* 1026b does not play a role in quorum sensing, virulence factor production, or extrusion of aminoglycosides but is a broad-spectrum drug efflux system. *Antimicrob Agents Chemother* 2010; 54(8):3113–20. <http://www.ncbi.nlm.nih.gov/pubmed/20498323>.
28. Podnecky NL, Wuthiekanun V, Peacock SJ, Schweizer HP. The BpeEF-OprC efflux pump is responsible for widespread trimethoprim resistance in clinical and environmental *Burkholderia pseudomallei* isolates. *Antimicrob Agents Chemother* 2013; 57(9):4381–6. <http://www.ncbi.nlm.nih.gov/pubmed/23817379>.
29. Araujo P. Key aspects of analytical method validation and linearity evaluation. *J Chromatogr B Anal Technol Biomed Life Sci* 2009; 877(23):2224–34. <http://www.ncbi.nlm.nih.gov/pubmed/18929516>.
30. Svanvik N, Stahlberg A, Sehlstedt U, Sjoback R, Kubista M. Detection of PCR products in real time using light-up probes. *Anal Biochem*. 2000; 287(1):179–82. <http://www.ncbi.nlm.nih.gov/pubmed/11078598>.
31. Price EP, Dale JL, Cook JM, Sarovich DS, Seymour ML, Ginther JL, Kaufman EL, Beckstrom-Sternberg SM, Mayo M, Kaestli M, Glass MB, Gee JE, Wuthiekanun V, Warner JM, Baker A, Foster JT, Tan P, Tuanyok A, Limmathurotsakul D, Peacock SJ, Currie BJ, Wagner DM, Keim P, Pearson T. Development and validation of *Burkholderia pseudomallei*-specific real-time PCR assays for clinical, environmental or forensic detection applications. *PLoS One* 2012; 7(5):e37723. <http://www.ncbi.nlm.nih.gov/pubmed/22624061>.
32. Wiersinga WJ, Currie BJ, Peacock SJ. Melioidosis. *N Engl J Med* 2012; 367(11):1035–44. <https://www.ncbi.nlm.nih.gov/pubmed/22970946>.
33. Sarovich DS, Price EP, Von Schulze AT, Cook JM, Mayo M, Watson LM, Richardson L, Seymour ML, Tuanyok A, Engelthaler DM, Pearson T, Peacock SJ, Currie BJ, Keim P, Wagner DM. Characterization of ceftazidime resistance mechanisms in clinical isolates of *Burkholderia pseudomallei* from Australia. *PLoS One* 2012; 7(2):e30789. <http://www.ncbi.nlm.nih.gov/pubmed/22363490>.
34. Chantratita N, Rholi DA, Sim B, Wuthiekanun V, Limmathurotsakul D, Amornchai P, Thanwisai A, Chua HH, Ooi WF, Holden MT, Day NP, Tan P, Schweizer HP, Peacock SJ. Antimicrobial resistance to ceftazidime involving loss of penicillin-binding protein 3 in *Burkholderia pseudomallei*. *Proc Natl Acad Sci U S A* 2011; 108(41):17165–70. <http://www.ncbi.nlm.nih.gov/pubmed/21969582>.
35. Clinical and Laboratory Standards Institute. Performance standards for antimicrobial susceptibility testing; twenty-fifth informational supplement. Clin. Lab. Standards Institute, Wayne, PA 2015; .
36. Malinga L, Brand J, Olorunju S, Stoltz A, van der Walt M. Molecular analysis of genetic mutations among cross-resistant second-line injectable drugs reveals a new resistant mutation in *Mycobacterium tuberculosis*. *Diagn Microbiol Infect Dis* 2016; 85(4):433–7. <https://www.ncbi.nlm.nih.gov/pubmed/27298046>.
37. Toprak E, Veres A, Michel JB, Chait R, Hartl DL, Kishony R. Evolutionary paths to antibiotic resistance under dynamically sustained drug selection. *Nat Genet*. 2011; 44(1):101–5. <https://www.ncbi.nlm.nih.gov/pubmed/22179135>.
38. Weinreich DM, Delaney NF, Depristo MA, Hartl DL. Darwinian evolution can follow only very few mutational paths to fitter proteins. *Science* 2006; 312(5770):111–4. <https://www.ncbi.nlm.nih.gov/pubmed/16601193>.
39. Maurin M. Real-time PCR as a diagnostic tool for bacterial diseases. *Expert Rev Mol Diagn* 2012; 12(7):731–54. <http://www.ncbi.nlm.nih.gov/pubmed/23153240>.
40. Abramson T, Kedem H, Relman DA. Proinflammatory and proapoptotic activities associated with *Bordetella pertussis* filamentous hemagglutinin. *Infect Immun* 2001; 69(4):2650–8. <http://www.ncbi.nlm.nih.gov/pubmed/11254631>.
41. Rholi DA, Papp-Wallace KM, Tomaras AP, Vasil ML, Bonomo RA, Schweizer HP. Molecular investigations of PenA-mediated beta-lactam



Webb et al.

- resistance in *Burkholderia pseudomallei*. *Front Microbiol* 2011; 2:139. <http://www.ncbi.nlm.nih.gov/pubmed/21747814>.
42. Sarovich DS, Price EP, Limmathurotsakul D, Cook JM, Von Schulze AT, Wolken SR, Keim P, Peacock SJ, Pearson T. Development of ceftazidime resistance in an acute *Burkholderia pseudomallei* infection. *Infect Drug Resist*. 2012; 5:129–32. <http://www.ncbi.nlm.nih.gov/pubmed/22977307>.
  43. Hayden HS, Lim R, Brittnacher MJ, Sims EH, Ramage ER, Fong C, Wu Z, Crist E, Chang J, Zhou Y, Radey M, Rohmer L, Haugen E, Gillett W, Wuthiekanun V, Peacock SJ, Kaul R, Miller SI, Manoil C, Jacobs MA. Evolution of *Burkholderia pseudomallei* in recurrent melioidosis. *PLoS One* 2012; 7(5):e36507. <https://www.ncbi.nlm.nih.gov/pubmed/22615773>.
  44. Teran W, Felipe A, Segura A, Rojas A, Ramos JL, Gallegos MT. Antibiotic-dependent induction of *Pseudomonas putida* DOT-T1E TtgABC efflux pump is mediated by the drug binding repressor TtgR. *Antimicrob Agents Chemother* 2003; 47(10):3067–72. <http://www.ncbi.nlm.nih.gov/pubmed/14506010>.
  45. Schumacher MA, Brennan RG. Deciphering the molecular basis of multidrug recognition: Crystal structures of the *Staphylococcus aureus* multidrug binding transcription regulator QacR. *Res Microbiol* 2003; 154(2):69–77. <http://www.ncbi.nlm.nih.gov/pubmed/12648720>.
  46. Buckingham L, Flaws ML. *Molecular diagnostics: Fundamentals, methods, & clinical applications*. Philadelphia, Pa, USA: F.A. Davis; 2007.
  47. Beld M, Minnaar R, Weel J, Sol C, Damen M, van der Avoort H, Wertheim-van Dillen P, van Breda A, Boom R. Highly sensitive assay for detection of enterovirus in clinical specimens by reverse transcription-PCR with an armored RNA internal control. *J Clin Microbiol* 2004; 42(7):3059–64. <https://www.ncbi.nlm.nih.gov/pubmed/15243060>.
  48. Kajiura LN, Stewart SD, Dresios J, Uyehara CF. Simultaneous Extraction of Viral and Bacterial Nucleic Acids for Molecular Diagnostic Applications. *J Biomol Tech* 2015; 26(4):118–24. <https://www.ncbi.nlm.nih.gov/pubmed/26543438>.
  49. Crisan A, McKee G, Munzner T, Gardy JL. Evidence-based design and evaluation of a whole genome sequencing clinical report for the reference microbiology laboratory. *PeerJ* 2018; 6:e4218. <https://www.ncbi.nlm.nih.gov/pubmed/29340235>.
  50. Propst KL, Mima T, Choi KH, Dow SW, Schweizer HP. A *Burkholderia pseudomallei* deltapurM mutant is avirulent in immunocompetent and immunodeficient animals: candidate strain for exclusion from select-agent lists. *Infect Immun* 2010; 78(7):3136–43. <http://www.ncbi.nlm.nih.gov/pubmed/20404077>.
  51. Lopez CM, Rholl DA, Trunck LA, Schweizer HP. Versatile dual-technology system for markerless allele replacement in *Burkholderia pseudomallei*. *Appl Environ Microbiol* 2009; 75(20):6496–503. <http://www.ncbi.nlm.nih.gov/pubmed/19700544>.
  52. Liss L. New M13 host: DH5 F competent cells. *Focus* 1987; 9(13).
  53. Clinical and Laboratory Standards Institute. *Methods for antimicrobial dilution and disk susceptibility testing of infrequently isolated or fastidious bacteria approved guideline*. Clin. Lab. Standards Institute, Wayne, PA 2015; 3rd ed. CLSI, Wayne, PA.
  54. Crowe A, McMahon N, Currie BJ, Baird RW. Current antimicrobial susceptibility of first-episode melioidosis *Burkholderia pseudomallei* isolates from the Northern Territory, Australia. *Int J Antimicrob Agents* 2014; 44(2):160–2. <http://www.ncbi.nlm.nih.gov/pubmed/24924662>.
  55. Maloney S, Engler C, Norton R. Epidemiological cut-off value of clinical isolates of *Burkholderia pseudomallei* from Northern Queensland to meropenem, ceftazidime, trimethoprim/sulfamethoxazole and doxycycline by the microbroth dilution method. *J Glob Antimicrob Resist*. 2017; 10:291–294. <http://www.ncbi.nlm.nih.gov/pubmed/28729203>.
  56. Choi KH, Mima T, Casart Y, Rholl D, Kumar A, Beacham IR, Schweizer HP. Genetic tools for select-agent-compliant manipulation of *Burkholderia pseudomallei*. *Appl Environ Microbiol* 2008; 74(4):1064–75. <http://www.ncbi.nlm.nih.gov/pubmed/18156318>.
  57. Johnson SL, Baker AL, Chain PS, Currie BJ, Daligault HE, Davenport KW, Davis CB, Inglis TJ, Kaestli M, Koren S, Mayo M, Merritt AJ, Price EP, Sarovich DS, Warner J, Rosovitz MJ. Whole-genome sequences of 80 environmental and clinical isolates of *Burkholderia pseudomallei*. *Genome Announc*. 2015; 3(1). <http://www.ncbi.nlm.nih.gov/pubmed/25676747>.
  58. Li H, Durbin R. Fast and accurate short read alignment with burrows-wheeler transform. *Bioinformatics* 2009; 25(14):1754–60. <http://www.ncbi.nlm.nih.gov/pubmed/19451168>.
  59. Li H, Handsaker B, Wysoker A, Fennell T, Ruan J, Homer N, Marth G, Abecasis G, Durbin R. The sequence alignment/map format and SAMtools. *Bioinformatics* 2009; 25(16):2078–9. <http://www.ncbi.nlm.nih.gov/pubmed/19505943>.
  60. McKenna A, Hanna M, Banks E, Sivachenko A, Cibulskis K, Kernytzky A, Garimella K, Altshuler D, Gabriel S, Daly M, DePristo MA. The genome analysis toolkit: A map reduce framework for analyzing next-generation DNA sequencing data. *Genome Res* 2010; 20(9):1297–303. <http://www.ncbi.nlm.nih.gov/pubmed/20644199>.
  61. Cingolani P, Platts A, Wang le L, Coon M, Nguyen T, Wang L, Land SJ, Lu X, Ruden DM. A program for annotating and predicting the effects of single nucleotide polymorphisms, SnpEff: SNPs in the genome of *Drosophila melanogaster* strain w1118; iso-2; iso-3. *Fly (Austin)* 2012; 6(2):80–92. <http://www.ncbi.nlm.nih.gov/pubmed/22728672>.
  62. Sarovich DS, Price EP. SPANDx: A genomics pipeline for comparative analysis of large haploid whole genome re-sequencing datasets. *BMC Res Notes* 2014; 7:618. <http://www.ncbi.nlm.nih.gov/pubmed/25201145>.
  63. Holden MT, Titball RW, Peacock SJ, Cerdeno-Tarraga AM, Atkins T, Crossman LC, Pitt T, Churcher C, Mungall K, Bentley SD, Sebahia M, Thomson NR, Bason N, Beacham IR, Brooks K, Brown KA, Brown NF, Challis GL, Cherevach I, Chillingworth T, Cronin A, Crossett B, Davis P, DeShazer D, Feltwell T, Fraser A, Hance Z, Hauser H, Holroyd S, Jagels K, Keith KE, Maddison M, Moule S, Price C, Quail MA, Rabinowitsch E, Rutherford K, Sanders M, Simmonds M, Songsivilai S, Stevens K, Tumapa S, Vesaratchavest M, Whitehead S, Yeats C, Barrell BG, Oyston PC, Parkhill J. Genomic plasticity of the causative agent of melioidosis, *Burkholderia pseudomallei*. *Proc Natl Acad Sci U S A* 2004; 101(39):14240–5. <http://www.ncbi.nlm.nih.gov/pubmed/15377794>.
